# Supplementary material for: Progression of cerebral infarction before and after thrombectomy is modified by prehospital pathways
Source: PubMed Central journal article supplement — J Neurointerv Surg. 2021 May 13;14(5):485–9. doi: 10.1136/neurintsurg-2020-017155 (PMC9016250; doi:10.1136/neurintsurg-2020-017155), 2021-05-13
Supplement: neurintsurg-2020-017155supp001.pdf [file neurintsurg-2020-017155supp001.pdf]

## SUPPLEMENTAL MATERIAL

### **Progression of cerebral infarction before and after thrombectomy is modified by pre-hospital pathways**

Alexander M Kollikowski,<sup>1</sup> Franziska Cattus,<sup>1</sup> Julia Haag,<sup>1</sup> Jörn Feick,<sup>1</sup>

Alexander G März,<sup>1</sup> Franziska Weidner,<sup>1</sup> Michael K Schuhmann,<sup>2</sup>

Wolfgang Müllges,<sup>2</sup> Guido Stoll,<sup>2</sup> Mirko Pham,<sup>1</sup> Marc Strinitz<sup>1</sup>

<sup>1</sup>Institut für Diagnostische und Interventionelle Neuroradiologie, Universitätsklinikum Würzburg, Würzburg, Bayern, Germany

<sup>2</sup>Neurologische Klinik und Polklinik, Universitätsklinikum Würzburg, Würzburg, Bayern, Germany

Correspondence to: Dr Alexander M Kollikowski, Institut für Diagnostische und Interventionelle Neuroradiologie, Universitätsklinikum Würzburg, Würzburg, Bayern, Germany; kollikowsk\_a@ukw.de

Supplemental Figure 1: Treatment pathways for mechanical thrombectomy and the putative effect on infarct extent as assessed by ASPECTS.

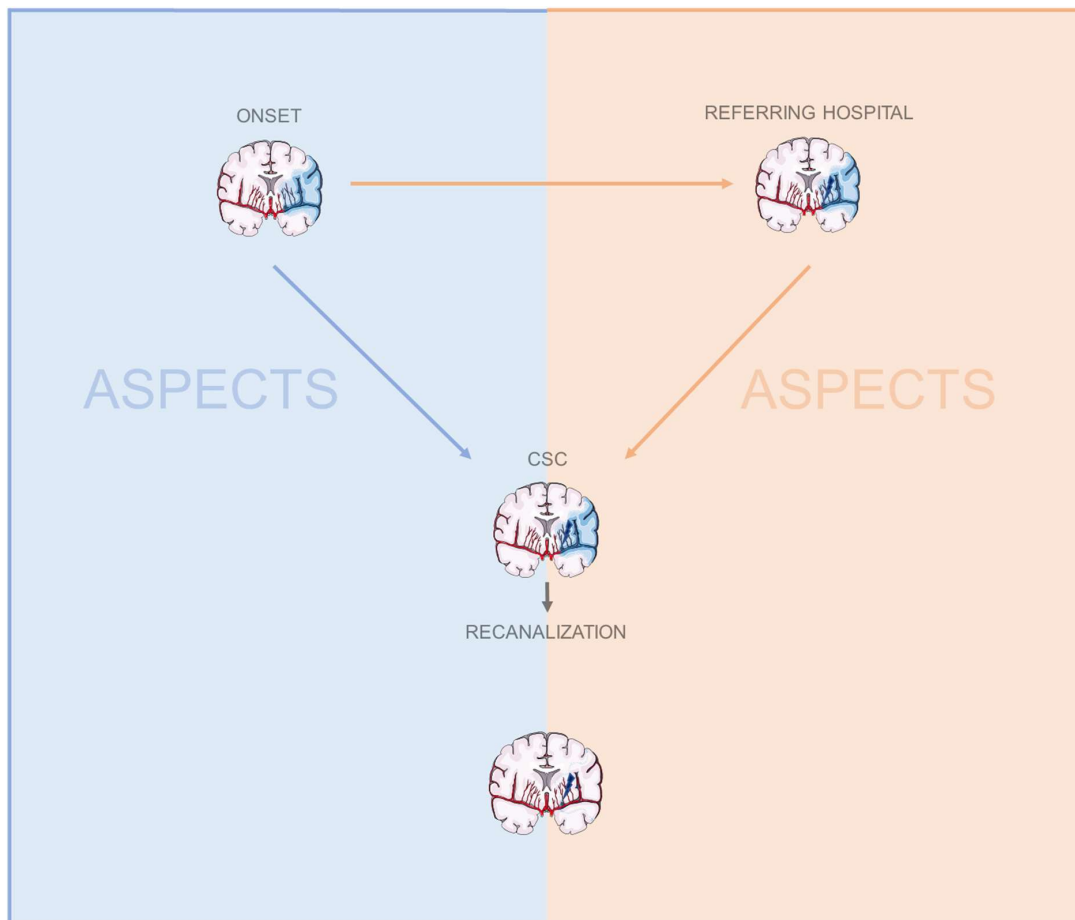

Left panel, mothership pathway; Right panel, drip-and-ship pathway. ASPECTS, Alberta Stroke Program Early CT Score; CSC, comprehensive stroke center.

The graphical content of this figure was freely available and free to be adapted under the creative commons attribution license (<https://smart.servier.com>).

Supplemental Table 1: ASPECTS according to the mothership and drip-and-ship treatment pathway for mechanical thrombectomy.

|                                 | <b>MS</b><br>n=221 | <b>DS</b><br>n=314 | <b>p</b> |
|---------------------------------|--------------------|--------------------|----------|
| ASPECTS-RH admission            | -                  | 9 (8-10)           |          |
| ASPECTS-CSC admission           | 9 (7-10)           | 7 (6-9)            | <0.0001  |
| ASPECTS-CSC FU                  | 7 (4-8)            | 6 (3-7)            | 0.001    |
| $\Delta$ -ASPECTS <sup>  </sup> | 2 (0-3)            | 3 (2-6)            | <0.0001  |

ASPECTS, Alberta Stroke Program Early CT Score; MS, mothership; DS, drip-and-ship; RH, referring hospital; CSC, comprehensive stroke center; FU, follow-up.

<sup>||</sup>Decline between baseline and postinterventional follow-up imaging.

Supplemental Table 2: Exploratory univariate regression analysis between recorded patient characteristics, interventional-, and logistic variables, and ASPECTS decline.

| <b>Variable</b>                            | <b>B</b> | <b>SE</b> | <b>t</b> | <b>R<sup>2</sup></b> | <b>p</b> |
|--------------------------------------------|----------|-----------|----------|----------------------|----------|
| Male sex                                   | 0.392    | 0.249     | 1.573    | 0.005                | 0.117    |
| Age                                        | -0.011   | 0.01      | -1.113   | 0.003                | 0.266    |
| Inter-facility transfer<br>(drip-and-ship) | 1.514    | 0.242     | 6.249    | 0.077                | <0.0001  |
| Transport distance<br>(ground bound)       | 0.009    | 0.004     | 2.015    | 0.014                | 0.045    |
| Transfer time                              | 0.000096 | 0.002     | 0.005    | 0.0000001            | 0.996    |
| Air transport                              | 1.491    | 0.317     | 4.702    | 0.047                | <0.0001  |
| Baseline ASPECTS<br>(initial imaging)      | 0.168    | 0.085     | 1.983    | 0.008                | 0.048    |

|                               |          |         |        |          |         |
|-------------------------------|----------|---------|--------|----------|---------|
| Unknown time of symptom onset | -0.665   | 0.357   | -1.862 | 0.007    | 0.063   |
| NIHSS at CSC-presentation     | 0.091    | 0.018   | 5.053  | 0.059    | <0.0001 |
| Systolic blood pressure       | 0.005    | 0.005   | 1.001  | 0.003    | 0.3174  |
| Diastolic blood pressure      | 0.014    | 0.009   | 1.654  | 0.008    | 0.099   |
| Heart rate                    | 0.005    | 0.007   | 0.731  | 0.002    | 0.465   |
| Hypertension                  | 0.289    | 0.334   | 0.866  | 0.002    | 0.387   |
| Diabetes mellitus             | 0.387    | 0.301   | 1.286  | 0.004    | 0.199   |
| Hyperlipidemia                | -0.187   | 0.272   | -0.686 | 0.001    | 0.493   |
| Atrial fibrillation           | 0.409    | 0.255   | 1.602  | 0.006    | 0.11    |
| Smoking history               | -0.349   | 0.263   | -1.332 | 0.004    | 0.184   |
| Antithrombotic medication     | -0.169   | 0.254   | -0.666 | 0.00099  | 0.506   |
| Antihypertensive drugs        | -0.038   | 0.297   | -0.129 | 0.000037 | 0.898   |
| IV alteplase                  | -0.118   | 0.252   | -0.47  | 0.00048  | 0.638   |
| Onset-to-puncture time        | -0.00016 | 0.00091 | -0.171 | 0.000084 | 0.865   |
| M1 occlusion                  | -0.404   | 0.254   | -1.587 | 0.005    | 0.113   |
| M2 occlusion                  | -0.363   | 0.328   | -1.107 | 0.0026   | 0.269   |
| ICA occlusion                 | 0.746    | 0.252   | 2.963  | 0.018    | 0.003   |
| Stent-retrieval maneuvers     | 0.357    | 0.069   | 5.151  | 0.063    | <0.0001 |
| mTICI                         | -0.861   | 0.163   | -5.297 | 0.064    | <0.0001 |
| Duration of MT procedure      | 0.004    | 0.002   | 2.502  | 0.015    | 0.013   |
| Onset-to-recanalization time  | 0.00137  | 0.00086 | 1.579  | 0.007    | 0.115   |
| Cervical ICA stenting         | 0.322    | 0.3118  | 1.033  | 0.003    | 0.302   |

ASPECTS, Alberta Stroke Program Early CT Score; NIHSS, National Institutes of Health Stroke Scale; CSC, comprehensive stroke center; IV, intravenous; M1/M2,

middle cerebral artery segment; ICA, internal carotid artery; mTICI, modified treatment in cerebral ischemia scale.
